# Supplementary material for: Financial disclosures of authors involved in spine research: an underestimated source of bias
Source: Springer Nature journal article supplement (doi:10.1007/s00586-011-2086-x), 2011-11-24
Supplement: MOESM1 [file 8603070]

References

1. Anasetti,F, Galbusera,F, Aziz,HN et al (2010) Spine stability after implantation of an interspinous device: an in vitro and finite element biomechanical study. J.Neurosurg.Spine. 13: 568-575

2. Karahalios,DG, Kaibara,T, Porter,RW et al (2010) Biomechanics of a lumbar interspinous anchor with anterior lumbar interbody fusion. J.Neurosurg.Spine. 12: 372-380

3. Kettler,A, Drumm,J, Heuer,F et al (2008) Can a modified interspinous spacer prevent instability in axial rotation and lateral bending? A biomechanical in vitro study resulting in a new idea. Clin.Biomech.(Bristol., Avon.). 23: 242-247

4. Lazaro,BC, Brasiliense,LB, Sawa,AG et al (2010) Biomechanics of a novel minimally invasive lumbar interspinous spacer: effects on kinematics, facet loads, and foramen height. Neurosurgery. 66: 126-132

5. Nandakumar,A, Clark,NA, Peehal,JP et al (2010) The increase in dural sac area is maintained at 2 years after X-stop implantation for the treatment of spinal stenosis with no significant alteration in lumbar spine range of movement. Spine J. 10: 762-768

6. Rolfe,KW, Zucherman,JF, Kondrashov,DG et al (2010) Scoliosis and interspinous decompression with the X-STOP: prospective minimum 1-year outcomes in lumbar spinal stenosis. Spine J. 10: 972-978

7. Sobottke,R, Rollinghoff,M, Siewe,J et al (2010) Clinical outcomes and quality of life 1 year after open microsurgical decompression or implantation of an interspinous stand-alone spacer. Minim.Invasive.Neurosurg. 53: 179-183

8. Agarwal,V, Wildstein,M, Tillman,JB et al (2009) Lumbar intersegmental spacing and angulation in the modified lateral decubitus position versus variants of prone positioning. Spine J. 9: 580-584

9. Collignon,F,Fransen,P (2010) [Treatment of symptomatic degenerative lumbar spinal stenosis by a percutaneous stand-alone lumbar interspinous implant. Preliminary experience with the Aperius device]. Neurochirurgie. 56: 3-7

10. Kaibara,T, Karahalios,DG, Porter,RW et al (2010) Biomechanics of a lumbar interspinous anchor with transforaminal lumbar interbody fixation. World Neurosurg. 73: 572-577

11. Krappel,FA (2010) [Long-term results, status of studies and differential indication regarding the DIAM implant]. Orthopade. 39: 585-594

12. Trautwein,FT, Lowery,GL, Wharton,ND et al (2010) Determination of the in vivo posterior loading environment of the Coflex interlaminar-interspinous implant. Spine J. 10: 244-251

13. Wilke,HJ, Drumm,J, Haussler,K et al (2010) [Biomechanics of interspinous spacers]. Orthopade. 39: 565-572

14. Goyal,A, Goel,VK, Mehta,A et al (2008) Cyclic loads do not compromise functionality of the interspinous spacer or cause damage to the spinal segment: an in vitro analysis. J.Long.Term.Eff.Med.Implants. 18: 289-302

15. Idler,C, Zucherman,JF, Yerby,S et al (2008) A novel technique of intra-spinous process injection of PMMA to augment the strength of an inter-spinous process device such as the X STOP. Spine 33: 452-456

16. Lee,SH, Lee,JH, Hong,SW et al (2010) Spinopelvic alignment after interspinous soft stabilization with a tension band system in grade 1 degenerative lumbar spondylolisthesis. Spine 35: E691-E701

17. Mayer,HM, Zentz,F, Siepe,C et al (2010) [Percutaneous interspinous distraction for the treatment of dynamic lumbar spinal stensois and low back pain.]. Oper.Orthop.Traumatol. 22: 495-511

18. Miller,JD,Nader,R (2008) Treatment of combined osteoporotic compression fractures and spinal stenosis: use of vertebral augumentation and interspinous process spacer. Spine 33: E717-E720

19. Nardi,P, Cabezas,D, Rea,G et al (2010) Aperius PercLID stand alone interspinous system for the treatment of degenerative lumbar stenosis: experience on 152 cases. J.Spinal Disord.Tech. 23: 203-207

20. Oppenheimer,JH, DeCastro,I,McDonnell,DE (2009) Minimally invasive spine technology and minimally invasive spine surgery: a historical review. Neurosurg.Focus. 27: E9-

21. Park,SW, Lim,TJ,Park,J (2010) A biomechanical study of the instrumented and adjacent lumbar levels after In-Space interspinous spacer insertion. J.Neurosurg.Spine. 12: 560-569

22. Pfeiffer,M (2010) [Interspinous implant "InSWing(R)" for the lumbar spine.]. Oper.Orthop.Traumatol. 22: 512-523

23. Shim,CS, Park,SW, Lee,SH et al (2008) Biomechanical evaluation of an interspinous stabilizing device, Locker. Spine 33: E820-E827

24. Yi,X,McPherson,B (2010) Application of X STOP device in the treatment of lumbar spinal stenosis. Pain Physician. 13: E327-E336

25. Brussee,P, Hauth,J, Donk,RD et al (2008) Self-rated evaluation of outcome of the implantation of interspinous process distraction (X-Stop) for neurogenic claudication. Eur.Spine J. 17: 200-203

26. Gunzburg,R, Szpalski,M, Callary,SA et al (2009) Effect of a novel interspinous implant on lumbar spinal range of motion. Eur.Spine J. 18: 696-703

27. Korovessis,P, Repantis,T, Zacharatos,S et al (2009) Does Wallis implant reduce adjacent segment degeneration above lumbosacral instrumented fusion? Eur.Spine J. 18: 830-840

28. Liu,G, Zhao,JN,Dezawa,A (2008) Endoscopic decompression combined with interspinous process implant fusion for lumbar spinal stenosis. Chin J.Traumatol. 11: 364-367

29. Senegas,J, Vital,JM, Pointillart,V et al (2009) Clinical evaluation of a lumbar interspinous dynamic stabilization device (the Wallis system) with a 13-year mean follow-up. Neurosurg.Rev. 32: 335-341

30. Wilke,HJ, Drumm,J, Haussler,K et al (2008) Biomechanical effect of different lumbar interspinous implants on flexibility and intradiscal pressure. Eur.Spine J. 17: 1049-1056

31. Kuchta,J, Sobottke,R, Eysel,P et al (2009) Two-year results of interspinous spacer (X-Stop) implantation in 175 patients with neurologic intermittent claudication due to lumbar spinal stenosis. Eur.Spine J. 18: 823-829

32. Sobottke,R, Schluter-Brust,K, Kaulhausen,T et al (2009) Interspinous implants (X Stop, Wallis, Diam) for the treatment of LSS: is there a correlation between radiological parameters and clinical outcome? Eur.Spine J. 18: 1494-1503

33. Moojen,WA, Arts,MP, Brand,R et al (2010) The Felix-trial. Double-blind randomization of interspinous implant or bony decompression for treatment of spinal stenosis related intermittent neurogenic claudication. BMC.Musculoskelet.Disord. 11:100.: 100-

34. Kantelhardt,SR, Torok,E, Gempt,J et al (2010) Safety and efficacy of a new percutaneously implantable interspinous process device. Acta Neurochir.(Wien.). 152: 1961-1967

35. Barbagallo,GM, Corbino,LA, Olindo,G et al (2010) The "sandwich phenomenon": a rare complication in adjacent, double-level X-stop surgery: report of three cases and review of the literature. Spine 35: E96-100

36. Barbagallo,GM, Olindo,G, Corbino,L et al (2009) Analysis of complications in patients treated with the X-Stop Interspinous Process Decompression System: proposal for a novel anatomic scoring system for patient selection and review of the literature. Neurosurgery. 65: 111-119

37. Bono,CM, Bawa,M, White,KK et al (2008) Residual motion on flexion-extension radiographs after simulated lumbar arthrodesis in human cadavers. J.Spinal Disord.Tech. 21: 364-371

38. Bowers,C, Amini,A, Dailey,AT et al (2010) Dynamic interspinous process stabilization: review of complications associated with the X-Stop device. Neurosurg.Focus. 28: E8-

39. Burnett,MG, Stein,SC,Bartels,RH (2010) Cost-effectiveness of current treatment strategies for lumbar spinal stenosis: nonsurgical care, laminectomy, and X-STOP. J.Neurosurg.Spine. 13: 39-46

40. Chung,KJ, Hwang,YS,Koh,SH (2009) Stress fracture of bilateral posterior facet after insertion of interspinous implant. Spine 34: E380-E383

41. Crawford,RJ, Price,RI,Singer,KP (2009) The effect of interspinous implant surgery on back surface shape and radiographic lumbar curvature. Clin.Biomech.(Bristol., Avon.). 24: 467-472

42. Kabir,SM, Gupta,SR,Casey,AT (2010) Lumbar interspinous spacers: a systematic review of clinical and biomechanical evidence. Spine 35: E1499-E1506

43. Miller,JD, Miller,MC,Lucas,MG (2010) Erosion of the spinous process: a potential cause of interspinous process spacer failure. J.Neurosurg.Spine. 12: 210-213

44. Verhoof,OJ, Bron,JL, Wapstra,FH et al (2008) High failure rate of the interspinous distraction device (X-Stop) for the treatment of lumbar spinal stenosis caused by degenerative spondylolisthesis. Eur.Spine J. 17: 188-192

45. Cabraja,M, Abbushi,A, Woiciechowsky,C et al (2009) The short- and mid-term effect of dynamic interspinous distraction in the treatment of recurrent lumbar facet joint pain. Eur.Spine J. 18: 1686-1694

46. Jerosch,J,Moursi,MG (2008) Foreign body reaction due to polyethylene's wear after implantation of an interspinal segment. Arch.Orthop.Trauma Surg. 128: 1-4

47. Park,SC, Yoon,SH, Hong,YP et al (2009) Minimum 2-year follow-up result of degenerative spinal stenosis treated with interspinous u (coflex). J.Korean Neurosurg.Soc. 46: 292-299

48. Richolt,JA, Rauschmann,MA,Schmidt,S (2010) [Interspinous Spacers - Technique of Coflex Implantation.]. Oper.Orthop.Traumatol. 22: 536-544

49. Richter,A, Schutz,C, Hauck,M et al (2010) Does an interspinous device (Coflex) improve the outcome of decompressive surgery in lumbar spinal stenosis? One-year follow up of a prospective case control study of 60 patients. Eur.Spine J. 19: 283-289

50. Siepe,CJ, Heider,F, Beisse,R et al (2010) [Treatment of dynamic spinal canal stenosis with an interspinous spacer.]. Oper.Orthop.Traumatol. 22: 524-535

51. Yano,S, Hida,K, Seki,T et al (2008) A new ceramic interspinous process spacer for lumbar spinal canal stenosis. Neurosurgery. 63: ONS108-ONS113

52. Anakwenze,OA, Auerbach,JD, Milby,AH et al (2009) Sagittal cervical alignment after cervical disc arthroplasty and anterior cervical discectomy and fusion: results of a prospective, randomized, controlled trial. Spine 34: 2001-2007

53. Anderson,PA, Puschak,TJ,Sasso,RC (2009) Comparison of short-term SF-36 results between total joint arthroplasty and cervical spine decompression and fusion or arthroplasty. Spine 34: 176-183

54. Anderson,PA, Sasso,RC,Riew,KD (2008) Comparison of adverse events between the Bryan artificial cervical disc and anterior cervical arthrodesis. Spine 33: 1305-1312

55. Burkus,JK, Haid,RW, Traynelis,VC et al (2010) Long-term clinical and radiographic outcomes of cervical disc replacement with the Prestige disc: results from a prospective randomized controlled clinical trial. J.Neurosurg.Spine. 13: 308-318

56. Crawford,NR, Arnett,JD, Butters,JA et al (2010) Biomechanics of a posture-controlling cervical artificial disc: mechanical, in vitro, and finite-element analysis. Neurosurg.Focus. 28: E11-

57. Goffin,J, van,LJ, Van,CF et al (2010) A clinical analysis of 4- and 6-year follow-up results after cervical disc replacement surgery using the Bryan Cervical Disc Prosthesis. J.Neurosurg.Spine. 12: 261-269

58. Heller,JG, Sasso,RC, Papadopoulos,SM et al (2009) Comparison of BRYAN cervical disc arthroplasty with anterior cervical decompression and fusion: clinical and radiographic results of a randomized, controlled, clinical trial. Spine 34: 101-107

59. Lin,CY, Kang,H, Rouleau,JP et al (2009) Stress analysis of the interface between cervical vertebrae end plates and the Bryan, Prestige LP, and ProDisc-C cervical disc prostheses: an in vivo image-based finite element study. Spine 34: 1554-1560

60. Park,JJ, Quirno,M, Cunningham,MR et al (2010) Analysis of segmental cervical spine vertebral motion after prodisc-C cervical disc replacement. Spine 35: E285-E289

61. Phillips,FM, Allen,TR, Regan,JJ et al (2009) Cervical disc replacement in patients with and without previous adjacent level fusion surgery: a prospective study. Spine 34: 556-565

62. Antosh,IJ, DeVine,JG, Carpenter,CT et al (2010) Magnetic resonance imaging evaluation of adjacent segments after cervical disc arthroplasty: magnet strength and its effect on image quality. Clinical article. J.Neurosurg.Spine. 13: 722-726

63. Barrey,C, Mosnier,T, Jund,J et al (2009) In vitro evaluation of a ball-and-socket cervical disc prosthesis with cranial geometric center. J.Neurosurg.Spine. 11: 538-546

64. Buchowski,JM, Anderson,PA, Sekhon,L et al (2009) Cervical disc arthroplasty compared with arthrodesis for the treatment of myelopathy. Surgical technique. J.Bone Joint Surg.Am. 91 Suppl 2:223-32.: 223-232

65. Coric,D, Cassis,J, Carew,JD et al (2010) Prospective study of cervical arthroplasty in 98 patients involved in 1 of 3 separate investigational device exemption studies from a single investigational site with a minimum 2-year follow-up. Clinical article. J.Neurosurg.Spine. 13: 715-721

66. Cunningham,BW, Hu,N, Zorn,CM et al (2010) Comparative fixation methods of cervical disc arthroplasty versus conventional methods of anterior cervical arthrodesis: serration, teeth, keels, or screws? J.Neurosurg.Spine. 12: 214-220

67. Cunningham,BW, Hu,N, Zorn,CM et al (2010) Biomechanical comparison of single- and two-level cervical arthroplasty versus arthrodesis: effect on adjacent-level spinal kinematics. Spine J. 10: 341-349

68. Kang,H, Park,P, La,MF et al (2010) Analysis of load sharing on uncovertebral and facet joints at the C5-6 level with implantation of the Bryan, Prestige LP, or ProDisc-C cervical disc prosthesis: an in vivo image-based finite element study. Neurosurg.Focus. 28: E9-

69. Kikkawa,J, Cunningham,BW, Shirado,O et al (2010) Multidirectional flexibility of the spine following posterior decompressive surgery after single-level cervical disc arthroplasty: an in vitro biomechanical investigation. Spine 35: E1465-E1471

70. Kim,SW, Paik,SH, Castro,PA et al (2010) Analysis of factors that may influence range of motion after cervical disc arthroplasty. Spine J. 10: 683-688

71. Lazaro,BC, Yucesoy,K, Yuksel,KZ et al (2010) Effect of arthroplasty design on cervical spine kinematics: analysis of the Bryan Disc, ProDisc-C, and Synergy Disc. Neurosurg.Focus. 28: E6-

72. Matz,PG, Ryken,TC, Groff,MW et al (2009) Techniques for anterior cervical decompression for radiculopathy. J.Neurosurg.Spine. 11: 183-197

73. Murrey,D, Janssen,M, Delamarter,R et al (2009) Results of the prospective, randomized, controlled multicenter Food and Drug Administration investigational device exemption study of the ProDisc-C total disc replacement versus anterior discectomy and fusion for the treatment of 1-level symptomatic cervical disc disease. Spine J. 9: 275-286

74. Riew,KD, Buchowski,JM, Sasso,R et al (2008) Cervical disc arthroplasty compared with arthrodesis for the treatment of myelopathy. J.Bone Joint Surg.Am. 90: 2354-2364

75. Riina,J, Anderson,PA, Holly,LT et al (2009) The effect of an anterior cervical operation for cervical radiculopathy or myelopathy on associated headaches. J.Bone Joint Surg.Am. 91: 1919-1923

76. Sasso,RC,Best,NM (2008) Cervical kinematics after fusion and bryan disc arthroplasty. J.Spinal Disord.Tech. 21: 19-22

77. Steinmetz,MP, Patel,R, Traynelis,V et al (2008) Cervical disc arthroplasty compared with fusion in a workers' compensation population. Neurosurgery. 63: 741-747

78. Terai,T, Faizan,A, Sairyo,K et al (2010) Operated and Adjacent Segment Motions for Fusion versus Cervical Arthroplasty: A Pilot Study. Clin.Orthop.Relat Res.

79. Zindrick,M, Harris,MB, Humphreys,SC et al (2010) Cervical disc arthroplasty. J.Am.Acad.Orthop.Surg. 18: 631-637

80. Arts,MP, Brand,R, van den,AE et al (2010) The NEtherlands Cervical Kinematics (NECK) Trial. Cost-effectiveness of anterior cervical discectomy with or without interbody fusion and arthroplasty in the treatment of cervical disc herniation; a double-blind randomised multicenter study. BMC.Musculoskelet.Disord. 11:122.: 122-

81. Baaj,AA, Uribe,JS, Vale,FL et al (2009) History of cervical disc arthroplasty. Neurosurg.Focus. 27: E10-

82. Kishen,TJ,Diwan,AD (2010) Fusion versus disk replacement for degenerative conditions of the lumbar and cervical spine: quid est testimonium? Orthop.Clin.North Am. 41: 167-181

83. Shikinami,Y, Kawabe,Y, Yasukawa,K et al (2010) A biomimetic artificial intervertebral disc system composed of a cubic three-dimensional fabric. Spine J. 10: 141-152

84. Zhang,X, Ordway,NR, Tan,R et al (2008) Correlation of ProDisc-C failure strength with cervical bone mineral content and endplate strength. J.Spinal Disord.Tech. 21: 400-405

85. Walraevens,J, Demaerel,P, Suetens,P et al (2010) Longitudinal prospective long-term radiographic follow-up after treatment of single-level cervical disk disease with the Bryan Cervical Disc. Neurosurgery. 67: 679-687

86. Walraevens,JR, Liu,B, Sloten,JV et al (2010) Postoperative segmental malalignment after surgery with the Bryan cervical disc prosthesis: is it related to the mechanics and design of the prosthesis? J.Spinal Disord.Tech. 23: 372-376

87. Ahn,HS,DiAngelo,DJ (2008) A biomechanical study of artificial cervical discs using computer simulation. Spine 33: 883-892

88. Ahn,PG, Kim,KN, Moon,SW et al (2009) Changes in cervical range of motion and sagittal alignment in early and late phases after total disc replacement: radiographic follow-up exceeding 2 years. J.Neurosurg.Spine. 11: 688-695

89. Auerbach,JD, Jones,KJ, Fras,CI et al (2008) The prevalence of indications and contraindications to cervical total disc replacement. Spine J. 8: 711-716

90. Barbagallo,GM, Corbino,LA, Papavero,L et al (2009) Anatomic midline marking during cervical arthroplasty with ProDisc-C: an alternative, simple, and reliable method: technical note. J.Spinal Disord.Tech. 22: 610-614

91. Cardoso,MJ,Rosner,MK (2010) Multilevel cervical arthroplasty with artificial disc replacement. Neurosurg.Focus. 28: E19-

92. Cho,BY, Lim,J, Sim,HB et al (2010) Biomechanical analysis of the range of motion after placement of a two-level cervical ProDisc-C versus hybrid construct. Spine 35: 1769-1776

93. de Jongh,CU, Basson,AH,Scheffer,C (2008) Predictive modelling of cervical disc implant wear. J.Biomech. 41: 3177-3183

94. Duggal,N, Bertagnoli,R, Rabin,D et al (2010) ProDisc-C. An in vivo kinematic study. J.Spinal Disord.Tech. 00: 1-5

95. Greiner-Perth,R, Allam,Y, Silbermann,J et al (2009) [First experience and preliminary clinical results with the cervical disc replacement DISCOVER]. Z.Orthop.Unfall. 147: 582-587

96. Grob,D (2010) [The spinal intervertebral disc]. Orthopade. 39: 335-347

97. Kang,KC, Lee,CS, Han,JH et al (2010) The factors that influence the postoperative segmental range of motion after cervical artificial disc replacement. Spine J. 10: 689-696

98. Keachie,K, Shahlaie,K,Muizelaar,JP (2010) Upper thoracic spine arthroplasty via the anterior approach. J.Neurosurg.Spine. 13: 240-245

99. Phillips,FM, Tzermiadianos,MN, Voronov,LI et al (2009) Effect of two-level total disc replacement on cervical spine kinematics. Spine 34: E794-E799

100. Schluessmann,E, Aghayev,E, Staub,L et al (2010) SWISSspine: the case of a governmentally required HTA-registry for total disc arthroplasty: results of cervical disc prostheses. Spine 35: E1397-E1405

101. Xu,JX, Zhang,YZ, Shen,Y et al (2009) Effect of modified techniques in Bryan cervical disc arthroplasty. Spine 34: 1012-1017

102. Yang,S, Wu,X, Hu,Y et al (2008) Early and intermediate follow-up results after treatment of degenerative disc disease with the Bryan cervical disc prosthesis: single- and multiple-level. Spine 33: E371-E377

103. Beaurain,J, Bernard,P, Dufour,T et al (2009) Intermediate clinical and radiological results of cervical TDR (Mobi-C) with up to 2 years of follow-up. Eur.Spine J. 18: 841-850

104. Bonkowski,J, Avadhani,A, Manu,A et al (2010) Cervical disc replacement C5-6. Eur.Spine J. 19: 345-346

105. Cheng,L, Nie,L, Zhang,L et al (2009) Fusion versus Bryan Cervical Disc in two-level cervical disc disease: a prospective, randomised study. Int.Orthop. 33: 1347-1351

106. Finn,MA, Brodke,DS, Daubs,M et al (2009) Local and global subaxial cervical spine biomechanics after single-level fusion or cervical arthroplasty. Eur.Spine J. 18: 1520-1527

107. Heidecke,V, Burkert,W, Brucke,M et al (2008) Intervertebral disc replacement for cervical degenerative disease–clinical results and functional outcome at two years in patients implanted with the Bryan cervical disc prosthesis. Acta Neurochir.(Wien.). 150: 453-459

108. Kim,HK, Kim,MH, Cho,DS et al (2009) Surgical outcome of cervical arthroplasty using bryan(r). J.Korean Neurosurg.Soc. 46: 532-537

109. Kim,SW, Limson,MA, Kim,SB et al (2009) Comparison of radiographic changes after ACDF versus Bryan disc arthroplasty in single and bi-level cases. Eur.Spine J. 18: 218-231

110. Park,JH, Roh,KH, Cho,JY et al (2008) Comparative analysis of cervical arthroplasty using mobi-c(r) and anterior cervical discectomy and fusion using the solis(r) -cage. J.Korean Neurosurg.Soc. 44: 217-221

111. Schizas,C, Duff,JM, Tessitore,E et al (2009) [Non fusion techniques in spinal surgery]. Rev.Med.Suisse. 5: 2574-2577

112. Seo,M,Choi,D (2008) Adjacent segment disease after fusion for cervical spondylosis; myth or reality? Br.J.Neurosurg. 22: 195-199

113. Tian,W, Han,X, Liu,B et al (2010) Clinical and radiographic results of cervical artificial disc arthroplasty: over three years follow-up cohort study. Chin Med.J.(Engl.). 123: 2969-2973

114. Wenger,M, Hoonacker,P, Zachee,B et al (2009) Bryan cervical disc prostheses: preservation of function over time. J.Clin.Neurosci. 16: 220-225

115. Yang,YC, Nie,L, Cheng,L et al (2009) Clinical and radiographic reports following cervical arthroplasty: a 24-month follow-up. Int.Orthop. 33: 1037-1042

116. Zhao,YB, Sun,Y, Chen,ZQ et al (2010) Application of cervical arthroplasty with Bryan cervical disc: long-term X-ray and magnetic resonance imaging follow-up results. Chin Med.J.(Engl.). 123: 2999-3002

117. Rohl,K,Rohrich,F (2009) Artificial disc versus spinal fusion in the treatment of cervical spine degenerations in tetraplegics: a comparison of clinical results. Spinal Cord. 47: 705-708

118. Garrido,BJ, Taha,TA,Sasso,RC (2010) Clinical outcomes of Bryan cervical disc arthroplasty a prospective, randomized, controlled, single site trial with 48-month follow-up. J.Spinal Disord.Tech. 23: 367-371

119. Grupp,TM, Meisel,HJ, Cotton,JA et al (2010) Alternative bearing materials for intervertebral disc arthroplasty. Biomaterials. 31: 523-531

120. Kim,SW, Shin,JH, Arbatin,JJ et al (2008) Effects of a cervical disc prosthesis on maintaining sagittal alignment of the functional spinal unit and overall sagittal balance of the cervical spine. Eur.Spine J. 17: 20-29

121. McAfee,PC, Cappuccino,A, Cunningham,BW et al (2010) Lower incidence of dysphagia with cervical arthroplasty compared with ACDF in a prospective randomized clinical trial. J.Spinal Disord.Tech. 23: 1-8

122. Powell,JW, Sasso,RC, Metcalf,NH et al (2010) Quality of spinal motion with cervical disk arthroplasty: computer-aided radiographic analysis. J.Spinal Disord.Tech. 23: 89-95

123. Sasso,RC, Best,NM, Metcalf,NH et al (2008) Motion analysis of bryan cervical disc arthroplasty versus anterior discectomy and fusion: results from a prospective, randomized, multicenter, clinical trial. J.Spinal Disord.Tech. 21: 393-399

124. Roberto,RF, McDonald,T, Curtiss,S et al (2010) Kinematics of progressive circumferential ligament resection (decompression) in conjunction with cervical disc arthroplasty in a spondylotic spine model. Spine 35: 1676-1683

125. Jawahar,A, Cavanaugh,DA, Kerr,EJ, III et al (2010) Total disc arthroplasty does not affect the incidence of adjacent segment degeneration in cervical spine: results of 93 patients in three prospective randomized clinical trials. Spine J. 10: 1043-1048

126. Altaf,F, Derbyshire,N,Marshall,RW (2010) Cerebral venous sinus thrombosis following cervical disc arthroplasty. J.Bone Joint Surg.Br. 92: 576-578

127. Bartels,RH, Donk,R,Verbeek,AL (2010) No justification for cervical disk prostheses in clinical practice: a meta-analysis of randomized controlled trials. Neurosurgery. 66: 1153-1160

128. Botelho,RV, Moraes,OJ, Fernandes,GA et al (2010) A systematic review of randomized trials on the effect of cervical disc arthroplasty on reducing adjacent-level degeneration. Neurosurg.Focus. 28: E5-

129. Cavanaugh,DA, Nunley,PD, Kerr,EJ, III et al (2009) Delayed hyper-reactivity to metal ions after cervical disc arthroplasty: a case report and literature review. Spine 34: E262-E265

130. Galbusera,F, Bellini,CM, Raimondi,MT et al (2008) Cervical spine biomechanics following implantation of a disc prosthesis. Med.Eng Phys. 30: 1127-1133

131. Galbusera,F, Bellini,CM, Brayda-Bruno,M et al (2008) Biomechanical studies on cervical total disc arthroplasty: a literature review. Clin.Biomech.(Bristol., Avon.). 23: 1095-1104

132. Galbusera,F, Anasetti,F, Bellini,CM et al (2010) The influence of the axial, antero-posterior and lateral positions of the center of rotation of a ball-and-socket disc prosthesis on the cervical spine biomechanics. Clin.Biomech.(Bristol., Avon.). 25: 397-401

133. Hopf,C (2008) [Revision surgery after implantation of a vertebral disc prosthesis]. Orthopade. 37: 339-346

134. Kouyoumdjian,P, Bronsard,N, Vital,JM et al (2009) Centering of cervical disc replacements: usefulness of intraoperative anteroposterior fluoroscopic guidance to center cervical disc replacements: study on 20 discocerv (scient'x prosthesis). Spine 34: 1572-1577

135. Lee,JH, Jung,TG, Kim,HS et al (2010) Analysis of the incidence and clinical effect of the heterotopic ossification in a single-level cervical artificial disc replacement. Spine J. 10: 676-682

136. Pare,PE, Chan,FW, Bhattacharya,S et al (2009) Surface slide track mapping of implants for total disc arthroplasty. J.Biomech. %19;42: 131-139

137. Park,DK, Lin,EL,Phillips,FM (2010) Index and Adjacent Level Kinematics After Cervical Disc Replacement and Anterior Fusion: In Vivo Quantitative Radiographic Analysis. Spine epub ahead of print:

138. Patwardhan,AG, Tzermiadianos,MN, Tsitsopoulos,PP et al (2010) Primary and coupled motions after cervical total disc replacement using a compressible six-degree-of-freedom prosthesis. Eur.Spine J.

139. Peng,CW, Quirno,M, Bendo,JA et al (2009) Effect of intervertebral disc height on postoperative motion and clinical outcomes after Prodisc-C cervical disc replacement. Spine J. 9: 551-555

140. Rousseau,MA, Cottin,P, Levante,S et al (2008) In vivo kinematics of two types of ball-and-socket cervical disc replacements in the sagittal plane: cranial versus caudal geometric center. Spine 33: E6-E9

141. Rousseau,MA, Bonnet,X,Skalli,W (2008) Influence of the geometry of a ball-and-socket intervertebral prosthesis at the cervical spine: a finite element study. Spine 33: E10-E14

142. Ryu,KS, Park,CK, Jun,SC et al (2010) Radiological changes of the operated and adjacent segments following cervical arthroplasty after a minimum 24-month follow-up: comparison between the Bryan and Prodisc-C devices. J.Neurosurg.Spine. 13: 299-307

143. Suchomel,P, Jurak,L, Benes,V, III et al (2010) Clinical results and development of heterotopic ossification in total cervical disc replacement during a 4-year follow-up. Eur.Spine J. 19: 307-315

144. Tumialan,LM, Ponton,RP, Garvin,A et al (2010) Arthroplasty in the military: a preliminary experience with ProDisc-C and ProDisc-L. Neurosurg.Focus. 28: E18-

145. Whang,PG, Simpson,AK, Rechtine,G et al (2009) Current trends in spinal arthroplasty: an assessment of surgeon practices and attitudes regarding cervical and lumbar disk replacement. J.Spinal Disord.Tech. 22: 26-33

146. Yi,S, Kim,KN, Yang,MS et al (2010) Difference in occurrence of heterotopic ossification according to prosthesis type in the cervical artificial disc replacement. Spine 35: 1556-1561

147. Yi,S, Lee,DY, Ahn,PG et al (2009) Radiologically documented adjacent-segment degeneration after cervical arthroplasty: characteristics and review of cases. Surg.Neurol. 72: 325-329

148. (2009) Artificial intervertebral disc arthroplasty for treatment of degenerative disc disease of the cervical spine. Technol.Eval.Cent.Asses.Program.Exec.Summ. 24: 1-4

149. Bartels,RH, Donk,RD, Pavlov,P et al (2008) Comparison of biomechanical properties of cervical artificial disc prosthesis: a review. Clin.Neurol.Neurosurg. 110: 963-967

150. Bhadra,AK, Raman,AS, Casey,AT et al (2009) Single-level cervical radiculopathy: clinical outcome and cost-effectiveness of four techniques of anterior cervical discectomy and fusion and disc arthroplasty. Eur.Spine J. 18: 232-237

151. Denaro,V, Papalia,R, Denaro,L et al (2009) Cervical spinal disc replacement. J.Bone Joint Surg.Br. 91: 713-719

152. Grob,D, Porchet,F, Kleinstuck,FS et al (2010) A comparison of outcomes of cervical disc arthroplasty and fusion in everyday clinical practice: surgical and methodological aspects. Eur.Spine J. 19: 297-306

153. Jaramillo-de la Torre JJ, Grauer,JN,Yue,JJ (2008) Update on cervical disc arthroplasty: where are we and where are we going? Curr.Rev.Musculoskelet.Med. 1: 124-130

154. Korge,A, Siepe,CJ, Heider,F et al (2010) [Total Cervical Disk Replacement - Implant-Specific Approaches: Keel Implant (Prodisc-C Intervertebral Disk Prosthesis).]. Oper.Orthop.Traumatol. 22: 480-494

155. Korinth,MC (2008) Treatment of cervical degenerative disc disease - current status and trends. Zentralbl.Neurochir. 69: 113-124

156. Peng-Fei,S,Yu-Hua,J (2008) Cervical disc prosthesis replacement and interbody fusion: a comparative study. Int.Orthop. 32: 103-106

157. Ren,X, Wang,W, Chu,T et al (2010) The Intermediate Clinical Outcome and Its Limitations of Bryan Cervical Arthroplasty for Treatment of Cervical Disc Herniation. J.Spinal Disord.Tech.

158. Weber,F,Detzner,M (2010) [Cervical Arthroplasty Using the Bryan Cervical Disc System.]. Oper.Orthop.Traumatol. 22: 468-479

159. Yi,S, Lim,JH, Choi,KS et al (2009) Comparison of anterior cervical foraminotomy vs arthroplasty for unilateral cervical radiculopathy. Surg.Neurol. 71: 677-80, discussion

160. Nasca,RJ (2009) Cervical radiculopathy: current diagnostic and treatment options. J.Surg.Orthop.Adv. 18: 13-18
